# Supplementary material
Source: PubMed Central journal article supplement (PMC5440023)

SUPPLEMENTARY DATA

Supplementary Table 1. Diet ingredients with AIN-93G diet as a reference

|                           | <i>Diet Ingredients (g/kg)</i> |             |            |
|---------------------------|--------------------------------|-------------|------------|
|                           | <b>AIN-93G</b>                 | <b>Ctrl</b> | <b>EPA</b> |
| <b>Casein</b>             | 200                            | 200         | 200        |
| <b>L-Cysteine</b>         | 3                              | 3           | 3          |
| <b>Corn Starch</b>        | 397                            | 397         | 395        |
| <b>Maltodextrin</b>       | 132                            | 132         | 132        |
| <b>Sucrose</b>            | 100                            | 100         | 100        |
| <b>Soybean Oil</b>        | 70                             | 11.2        | 11.2       |
| <b>Coconut Oil</b>        | 0                              | 58.8        | 58.8       |
| <b>Cellulose</b>          | 50                             | 50          | 50         |
| <b>Mineral Mix</b>        | 35                             | 35          | 35         |
| <b>Vitamin Mix</b>        | 10                             | 10          | 10         |
| <b>Choline Bitartrate</b> | 2.5                            | 2.5         | 2.5        |
| <b>TBHQ, Antioxidant</b>  | 0.02                           | 0.02        | 0.02       |
| <b>EPA</b>                | 0                              | 0           | 2          |

Supplementary Table 2. Fatty acid composition of chow, control, and eicosapentaenoic acid (EPA) diets

|                   | <i>% of Total Fatty Acids</i> |                |            |
|-------------------|-------------------------------|----------------|------------|
|                   | <b>Chow</b>                   | <b>Control</b> | <b>EPA</b> |
| <b>8:0</b>        | 0.00                          | 1.17           | 1.88       |
| <b>10:0</b>       | 0.03                          | 5.13           | 4.97       |
| <b>12:0</b>       | 0.11                          | 47.74          | 44.37      |
| <b>14:0</b>       | 0.30                          | 18.20          | 16.97      |
| <b>16:0</b>       | 13.45                         | 9.55           | 9.12       |
| <b>16:1 (n-7)</b> | 0.15                          | 0.03           | 0.03       |
| <b>18:0</b>       | 2.96                          | 2.83           | 2.77       |
| <b>18:1 (n-9)</b> | 18.16                         | 7.03           | 6.91       |
| <b>18:1 (n-7)</b> | 0.95                          | 0.20           | 0.21       |
| <b>18:2 (n-6)</b> | 56.91                         | 7.01           | 7.12       |
| <b>18:3 (n-6)</b> | 0.00                          | 0.00           | 0.00       |
| <b>18:3 (n-3)</b> | 6.11                          | 0.94           | 0.94       |
| <b>20:0</b>       | 0.26                          | 0.07           | 0.08       |
| <b>20:1 (n-9)</b> | 0.35                          | 0.06           | 0.06       |
| <b>20:3 (n-6)</b> | 0.00                          | 0.00           | 0.00       |
| <b>20:4 (n-6)</b> | 0.00                          | 0.00           | 0.03       |
| <b>20:5 (n-3)</b> | 0.00                          | 0.00           | 4.50       |
| <b>22:0</b>       | 0.21                          | 0.04           | 0.04       |
| <b>22:1 (n-9)</b> | 0.04                          | 0.00           | 0.00       |
| <b>22:6 (n-3)</b> | 0.00                          | 0.00           | 0.00       |

SUPPLEMENTARY DATA

**Supplementary Table 3. Phospholipid composition of BTBR-Wt mice fed a control (Ctrl) or eicosapentaenoic acid (EPA) enriched diet.** Data were compared by an unpaired *t* test within each species (n = 6) \**P* < 0.05.

|                   | % of Total Fatty Acids ± SEM |        |       |        |   |
|-------------------|------------------------------|--------|-------|--------|---|
|                   | Ctrl                         |        | EPA   |        |   |
| <b>8:0</b>        | 0.00                         | ± 0.00 | 0.00  | ± 0.00 |   |
| <b>10:0</b>       | 0.50                         | ± 0.11 | 0.56  | ± 0.09 |   |
| <b>12:0</b>       | 3.03                         | ± 0.56 | 3.48  | ± 0.52 |   |
| <b>14:0</b>       | 7.96                         | ± 1.38 | 10.89 | ± 1.01 |   |
| <b>16:0</b>       | 18.45                        | ± 0.30 | 20.94 | ± 1.24 |   |
| <b>16:1 (n-7)</b> | 0.93                         | ± 0.05 | 1.06  | ± 0.05 |   |
| <b>18:0</b>       | 21.02                        | ± 0.58 | 20.39 | ± 0.80 |   |
| <b>18:1 (n-9)</b> | 10.98                        | ± 0.28 | 11.14 | ± 0.50 |   |
| <b>18:1 (n-7)</b> | 3.42                         | ± 0.13 | 2.79  | ± 0.16 |   |
| <b>18:2 (n-6)</b> | 4.38                         | ± 0.24 | 4.84  | ± 0.29 |   |
| <b>18:3 (n-6)</b> | 0.00                         | ± 0.00 | 0.00  | ± 0.00 |   |
| <b>18:3 (n-3)</b> | 1.32                         | ± 0.09 | 1.66  | ± 0.16 |   |
| <b>20:0</b>       | 0.29                         | ± 0.02 | 0.15  | ± 0.03 |   |
| <b>20:1 (n-9)</b> | 0.20                         | ± 0.09 | 0.07  | ± 0.05 |   |
| <b>20:3 (n-6)</b> | 0.89                         | ± 0.09 | 0.83  | ± 0.08 |   |
| <b>20:4 (n-6)</b> | 21.33                        | ± 1.20 | 9.27  | ± 0.71 | * |
| <b>20:5 (n-3)</b> | 0.00                         | ± 0.00 | 4.20  | ± 0.31 | * |
| <b>22:0</b>       | 0.38                         | ± 0.03 | 0.46  | ± 0.06 |   |
| <b>22:1 (n-9)</b> | 0.57                         | ± 0.06 | 0.72  | ± 0.10 |   |
| <b>22:6 (n-3)</b> | 4.34                         | ± 0.27 | 6.55  | ± 0.56 |   |

\*, *P* < 0.05

SUPPLEMENTARY DATA

**Supplementary Figure 1. Feeding EPA-enriched diet does not change glucose tolerance of BTBR-WT mice.** Male BTBR-WT mice fed either the defined control diet or EPA-enriched diet were fasted for 4-6 h before oral administration of 1 g/kg glucose. There was no significant difference between the glucose tolerance of the two groups. N=6 mice/group.

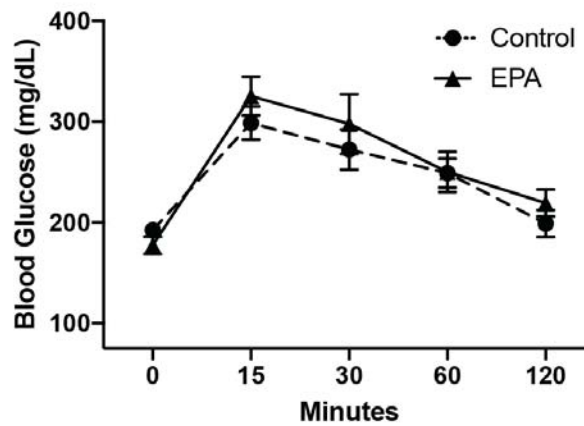

**Supplementary Figure 2. Neither PGE2 nor PGE3 affects GSIS from BTBR-WT islets.** Isolated BTBR-WT islets were stimulated with increasing concentrations of PGE2 or PGE3 for 45 min. Data are represented as a fold change to maximal stimulation at 16.7 mM glucose. Dose-response curves were compared by a two-way ANOVA followed by a Sidak post-test. N = 4-5; P=not significant.

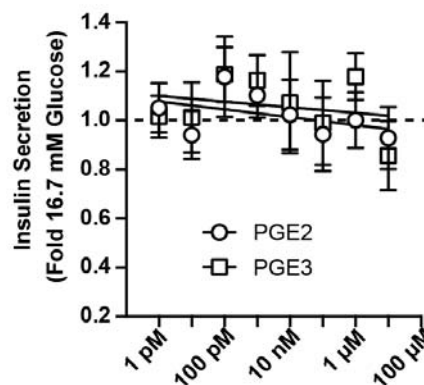

Supplement: DB161362SupplementaryData.pdf [file DB161362SupplementaryData.pdf]
